# Supplementary material
Source: PubMed Central journal article supplement (PMC3945181)
Supplement: NIHMS539782-supplement-01.pdf [file NIHMS539782-supplement-01.pdf]

Supplemental Table 1: Correlations of main outcome variables

| Outcome Variable                       | Heart Rate Variability | Hawthorne Friendship Scale (Isolation) | Perceived Stress Scale | Visual Analog Scale |
|----------------------------------------|------------------------|----------------------------------------|------------------------|---------------------|
| Heart Rate Variability                 | 1                      |                                        |                        |                     |
| Hawthorne Friendship Scale (Isolation) | -0.04<br>(0.68)        | 1                                      |                        |                     |
| Perceived Stress Scale                 | 0.03<br>(0.75)         | 0.64<br>(<0.01)                        | 1                      |                     |
| Visual Analog Scale                    | 0.15<br>(0.13)         | -0.14<br>(0.18)                        | 0.19<br>(0.06)         | 1                   |
| HIV Stigma Scale                       | 0.03<br>(0.78)         | -0.61<br>(<0.01)                       | 0.60<br>(<0.01)        | 0.08<br>(0.44)      |

Data are presented as pearson correlation coefficient r and the corresponding p-value is parentheses
